1

## Uninterpretable interactions: epistasis as uncertainty

2

Zachary R. Sailer<sup>1,2</sup> & Michael J. Harms<sup>1,2</sup>

3

1. Institute of Molecular Biology, University of Oregon, Eugene, OR 97403

4

2. Department of Chemistry & Biochemistry, University of Oregon, Eugene, OR 97403

5

## Abstract

6

Epistasis is a common feature of genotype-phenotype maps. Understanding the patterns of epistasis is critical for predicting unmeasured phenotypes, explaining evolutionary trajectories, and for inferring the biological mechanisms that determine a map. One common approach is to use a linear model to decompose epistasis into specific pairwise and high-order interactions between mutations. Such interactions are then used to identify important biology or to explain how the genotype-phenotype map shapes evolution. Here we show that the coefficients extracted from such analyses are likely uninterpretable. They cannot be extracted reliably from experimental genotype-phenotype maps due to regression bias. Further, we can generate epistatic “interactions” indistinguishable from those in experimental maps using a completely random process. From this, we conclude that epistasis should be treated as a random, but quantifiable, variation in these maps. This perspective allows us to build predictive models with known error from a small number of measured phenotypes. It also suggests that we need mechanistic, nonlinear models to account for epistasis and decompose genotype-phenotype maps.

7

8

9

10

11

12

13

14

15

16

17

18

19

20

## Introduction

21

Epistasis—that is, non-additivity between mutations—is a ubiquitous feature of genotype-phenotype maps (Fowler et al., 2010; Weinreich, 2011; Weinreich et al., 2013; Yokoyama et al., 2014; Anderson et al., 2015; Palmer et al., 2015; Podgornaia and Laub, 2015; Doud and Bloom, 2016; Boyle et al., 2017; Hopf et al., 2017; Chan et al., 2017; Sailer and Harms, 2017a; Starr et al., 2017; Domingo et al., 2018; Weinreich et al., 2018). Epistasis can provide mechanistic insight into the determinants of phenotypes (Schreiber and Fersht, 1995; Horovitz, 1996; Ritchie et al., 2001; Segrè et al., 2005); however, it also complicates predicting unmeasured phenotypes (de Visser and Krug, 2014; Miton and Tokuriki, 2016; Sailer and

22

23

24

25

26

27

28

29

Harms, 2017b; Nyerges et al., 2018), as the effect of a mutation changes depending on the presence or absence of other mutations. Despite a century of work (Fisher, 1918), epistasis remains challenging to analyze and interpret (Cordell, 2002; Phillips, 2008; Crow, 2010; Weinreich et al., 2013, 2018).

One approach is to decompose epistasis into specific pairwise and high-order interactions between mutations (Heckendorn and Whitley, 1999; Weinreich et al., 2013; Poelwijk et al., 2016; Sailer and Harms, 2017a; Poelwijk et al., 2017; Weinreich et al., 2018). This is often done by treating each coefficient as a linear and independent perturbation to the additive phenotype (Heckendorn and Whitley, 1999; Poelwijk et al., 2016). Such an approach is a direct extension of classic approaches in quantitative genetics and biochemistry. In a genetics context, one might measure the effect of a mutation in two genetic backgrounds to dissect metabolic and regulatory pathways (Ritchie et al., 2001; Segrè et al., 2005). Likewise, mutant cycles are a mainstay of biochemistry. Introducing mutations individually and together allows one to infer the nature of physical interactions between residues in macromolecules (Schreiber and Fersht, 1995; Horovitz, 1996).

Although linear epistasis models are very commonly used (Weinreich et al., 2013; Yokoyama et al., 2014; Anderson et al., 2015; Palmer et al., 2015; Starr et al., 2017; Domingo et al., 2018), two recent observations raise questions about their utility. The first is that regression can lead to biased estimates of linear epistatic coefficients, and thus poor predictive power of epistatic models (Otwinowski and Plotkin, 2014). The second is that one can generate maps with extensive pairwise and high-order epistasis using a toy model of proteins that do not explicitly include such interactions (Sailer and Harms, 2017b). This indicates that there may be no simple way to relate linear epistatic coefficients back to underlying biology, thus undermining their utility as indicators of biological mechanism.

Motivated by these concerns, we set out to systematically investigate linear epistatic models constructed from twelve published genotype-phenotype maps. We focused on two criteria for utility: the ability of such models to predict unmeasured phenotypes and the

ability of such coefficients to provide mechanistic insight into the map. We studied maps for 57  
which all  $2^L$  combinations of  $L$  mutations were measured. Because these maps have the same 58  
number of observations as coefficients in a high-order epistatic model, they can be readily 59  
decomposed into epistatic coefficients from second to  $L^{\text{th}}$ -order. Further, the selected maps 60  
cover many different classes of genotypes, phenotypes, and total magnitudes of epistasis. 61

We find that the epistatic coefficients we extract by regression from such maps are 62  
quite poor at predicting unmeasured phenotypes. This arises from bias in the regressed 63  
coefficients—exactly as predicted by Otwinowski and Plotkin (Otwinowski and Plotkin, 64  
2014). Further, we find we can generate epistatic coefficients similar to experimental co- 65  
efficients by simply using randomly assigned phenotypes. This suggests that the pairwise 66  
and high-order interactions we extract are likely decompositions of random noise. We there- 67  
fore propose that we should not decompose genotype-phenotype maps into specific interac- 68  
tions between mutations using linear models. Rather, in the context of a whole genotype- 69  
phenotype map, epistasis is best interpreted as a global metric capturing roughness (Szendro 70  
et al., 2013; Ferretti et al., 2018). This translates directly to a measure of uncertainty on 71  
predicted phenotypes, as well as an indication that an improved mechanistic model is re- 72  
quired. 73

## Materials and Methods 74

### Linear epistasis models 75

We used a linear epistasis model to decompose genotype-phenotype maps into up to  $L^{\text{th}}$ -order 76  
epistatic coefficients. The model is linear in that it consists of a collection of independent 77  
epistatic coefficients that are summed to describe each phenotype (Fisher, 1918; Poelwijk 78  
et al., 2016). (The assumption of linearity contrasts with other models, such as a Potts 79  
model, in which mutations sum in a nonlinear fashion (Hopf et al., 2017)). There are two 80

common formulations a linear epistasis model, the Hadamard model (sometimes called a Walsh or Fourier model) and the biochemical model (Poelwijk et al., 2016). The approaches differ in their choice of coordinate origin. Each model has been described in detail elsewhere (Heckendorn and Whitley, 1999; Weinreich et al., 2013; Poelwijk et al., 2016). The two models are related by a simple set of linear transformations (Poelwijk et al., 2016). Throughout the text, we describe our results using the Hadamard model, but our conclusions are robust to the choice of model (see supplemental figures referenced throughout the text).

The Hadamard model uses the geometric center of the map as the coordinate origin (Heckendorn and Whitley, 1999; Weinreich et al., 2013; Poelwijk et al., 2016; Sailer and Harms, 2017a). Each genotype is made up of  $L$  sites. In a binary genotype-phenotype map, the sites have two possible states: “wildtype” or “derived”. Both states have equal effects but opposite signs. Each mutation is treated as a linear perturbation away from the origin of the map,

$$P = \beta_{\text{origin}} + \sum_i^L \beta_i x_i \quad (1)$$

where  $\beta_{\text{origin}}$  is the origin of the genotype-phenotype map,  $\beta_i$  is the effect of site  $i$ , and  $x_i$  is 1 if site  $i$  is “wildtype” and  $-1$  if “derived”. We can then add linear coefficients to describe interactions between mutations to Eq. 1. For pairwise interactions, this has the form:

$$P = \beta_{\text{origin}} + \sum_i^L \beta_i x_i + \sum_{j < i}^L \beta_{ij} x_i x_j \quad (2)$$

where  $\beta_{ij}$  is a pairwise epistatic coefficient. For the high-order model, the expansion continues:

$$P = \beta_{\text{origin}} + \sum_i^L \beta_i x_i + \sum_{j < i}^L \beta_{ij} x_i x_j + \sum_{k < j < i}^L \beta_{ijk} x_i x_j x_k + \dots \quad (3)$$

The model can be expanded all the way to  $L^{\text{th}}$ -order interactions.

## Linearizing experimental genotype-phenotype maps

100

Prior to extracting epistatic coefficients from experimental genotype-phenotype maps, we corrected each map for *global* epistasis, which arises when mutations combine on some scale other than an additive scale (Chou et al., 2011; Tokuriki et al., 2012; Schenk et al., 2013; Sailer and Harms, 2017a; Otwinowski et al., 2018). This violates the assumption of linearity inherent in the epistasis models (Fisher, 1918; Cordell, 2002; Sailer and Harms, 2017a). Global epistasis manifests as a non-normal distribution of the residuals between the  $\vec{P}_{\text{obs}}$  (the vector of observed phenotypes) and  $\vec{P}_{\text{add}}$  (the vector phenotypes calculated using an additive model) (Sailer and Harms, 2017a; Otwinowski et al., 2018). Such epistasis can be minimized by identifying a nonlinear function  $T$  that captures global curvature in the relationship between  $\vec{P}_{\text{obs}}$  and  $\vec{P}_{\text{add}}$ , yielding normally distributed fit residuals (Box and Cox, 1964; Szendro et al., 2013; Sailer and Harms, 2017a; Otwinowski et al., 2018):

$$\vec{P}_{\text{obs}} = T(\vec{P}_{\text{add}}) + \vec{\varepsilon}. \quad (4)$$

where  $\vec{\varepsilon}$  are the fit residuals. We linearized all experimental maps by fitting a second-order spline to the  $\vec{P}_{\text{obs}}$  vs.  $\vec{P}_{\text{add}}$  curve for each map prior to extracting linear epistatic coefficients (Otwinowski et al., 2018).

## Epistasis and linear regression

115

We used linear regression to regress epistasis models against experimental and simulated genotype-phenotype maps. We formulated the problem as follows:

$$\vec{P}_{\text{obs}} = \mathbf{X}\vec{\beta} + \vec{\varepsilon} \quad (5)$$

where  $\vec{P}_{\text{obs}}$  is a vector of observed phenotypes (corrected for global epistasis),  $\vec{\beta}$  is a vector of 118  
epistatic coefficients,  $\mathbf{X}$  is a matrix that encodes the sign of each coefficient according to Eq. 119  
3, and  $\vec{\epsilon}$  is a vector of residuals. The goal was to estimate coefficients in  $\vec{\beta}$  that minimized 120  
the magnitudes of the values in  $\vec{\epsilon}$ . 121

We used three different regression approaches: ordinary least-squares, lasso, and ridge. 122  
The number of coefficients in these maps grows rapidly with the number of sites. For a 123  
binary map with  $L$  sites, there are  $2^L$  possible fit coefficients. Lasso and ridge regression 124  
are strategies to identify only those coefficients that contribute significantly to the variation 125  
in the data. These strategies have been used previously to dissect linear epistatic models 126  
(Otwinowski and Plotkin, 2014; Poelwijk et al., 2017). Throughout the text, we describe 127  
results using lasso regression, but our conclusions are robust to the choice of regression 128  
strategy (see supplemental figures referenced throughout the text). 129

## Simulating epistatic genotype-phenotype maps 130

We constructed genotype-phenotype maps using Equations 1 and 3. First, we set the addi- 131  
tive coefficients to random values drawn from a normal distribution. We then added all  $2^{\text{nd}}$ - 132  
through  $L^{\text{th}}$ -order epistatic coefficients. We set the values of the coefficients to random values 133  
drawn from a different normal distribution. The widths of the additive and epistatic distri- 134  
butions were tuned to match the relative magnitudes of epistatic coefficients extracted from 135  
experimental maps. Further, we could tune the fraction of epistasis in a simulated genotype- 136  
phenotype map by changing the relative widths of the additive and epistatic distributions 137  
with respect to one another. 138

## Software 139

We implemented the epistasis models using Python 3 extended with *numpy*, *scipy*, and *pan-* 140  
*das* (van der Walt et al., 2011; McKinney, 2010). We used the Python package *scikit-learn* to 141  
perform ordinary-, lasso-, and ridge- regression (Pedregosa et al., 2011). We used the Python 142

package *lmfit* to perform nonlinear-least squares regression (Newville et al., 2018). Plots were 143  
generated using *matplotlib* and *Jupyter* notebooks (Hunter, 2007; Perez and Granger, 2007). 144  
Our full software packages are available in the *gpmap* (<https://harmslab.github.com/gpmap>) 145  
and *epistasis* (<https://harmslab.github.com/epistasis>) packages on Github. 146

## Data availability statement 147

All software is available for download from: 148

- <https://github.com/harmslab/gpmap> 149
- <https://github.com/harmslab/epistasis>. 150

Data sets are available from: 151

- <https://github.com/harmslab/genotype-phenotype-maps>. 152

Supplemental figures S1-S4 are available via GSA Figshare. 153

## Results 154

### Regression yields biased estimates of epistatic coefficients 155

We started with a straightforward question: What fraction of a genotype-phenotype map 156  
must we observe to resolve a linear epistatic model that predicts unmeasured phenotypes? 157  
We simulated a genotype-phenotype map consisting of all  $2^8$  binary combinations of 8 muta- 158  
tions. We then assigned random epistatic coefficients using an 8th-order Hadamard matrix, 159  
such that epistasis accounted for 20% of the variation in phenotype (see methods). The 160  
epistatic coefficients were similar in magnitude and sign to those extracted from experimen- 161  
tal genotype-phenotype maps (Fig S1). 162

To test our ability to predict phenotypes, we masked a fraction of the genotypes, fit linear 163  
epistatic models to the unmasked genotypes, and attempted to predict the masked genotypes. 164



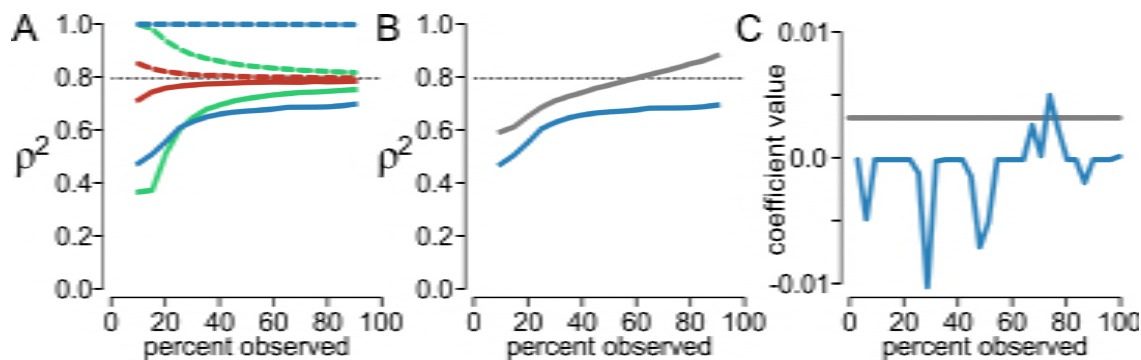

Figure 1: **Linear epistatic coefficients cannot be estimated from an incomplete, simulated genotype-phenotype map.** A) Fit scores versus the percent of the genotypes in the map used to train the model, from 10% to 90%. The dashed gray line indicates the amount of additive variation in the map (80%). Colors indicate model order: additive (red), pairwise epistasis (green), and high-order epistasis (blue). Dashed lines indicate  $\rho_{train}^2$  and solid lines indicate  $\rho_{test}^2$ . B) Fit scores versus the fraction of map used to train the model. Blue curve uses regressed coefficients (reproduced from panel A). Gray curve shows  $\rho_{test}^2$  if we use the coefficients used to generate the map. C) Value of a pairwise epistatic coefficient as we add data to the fit. Gray line indicates the value of the coefficient used to generate the map.

We then calculated the correlation between the model and unmasked observations ( $\rho_{train}^2$ ) 165  
 and the model and masked observations ( $\rho_{test}^2$ ). We repeated this for 1,000 pseudo-replicate 166  
 training and test sets. 167

As a starting point, we fit the additive model (Eq. 1). We found that the additive model 168  
 converged on  $\rho_{train}^2 = \rho_{test}^2 = 0.8$  when  $\gtrsim 30\%$  of the map was used for the fit (red lines, Fig 169  
 1A). The model converges once each mutation has been observed across a sufficient number 170  
 of genetic backgrounds to average out the epistatic perturbations to the phenotype. Because, 171  
 by construction, 20% of the variation in the map is due to epistasis, the best the additive 172  
 model can do is explain 80% of the variation in phenotype. 173

We next tried to improve our predictive power by adding coefficients describing either 174  
 pairwise interactions between mutations (Eq. 2) or all interactions (up to eighth-order) (Eq. 175  
 3). Because Eq. 3 is the model we used to generate the map, this model should, in principle, 176  
 be able to explain all variation in the map. 177

We found that neither the pairwise nor high-order models performed as well as the 178

additive model (green and blue lines, Fig 1A). Even when 90% of the genotypes were included 179  
in the training set, the pairwise and high-order models had  $\rho_{test}^2$  of 0.73 and 0.62—much less 180  
than the value of 0.80 achieved by the additive model. Worse, this failure to predict the 181  
test set was accompanied by much higher  $\rho_{train}^2$  values. The high-order model, in particular, 182  
had a correlation of 1.0 with the training set (Fig 1A, dashed blue line), even while test set 183  
correlation languished around 0.6 (Fig 1A, solid blue line). 184

This result arises because regression yields biased estimates of the epistatic coefficients 185  
(Ottwinowski and Plotkin, 2014). We know that high-order epistasis is present, because we 186  
used the same high-order model we are now fitting to generate the underlying map. The 187  
fit coefficients, however, do not accurately capture this variation. This can be seen in Fig 188  
1B. The blue line reproduces  $\rho_{test}^2$  for the high-order model from Fig 1A. The gray curve 189  
shows values of  $\rho_{test}^2$  calculated using the epistatic coefficients used to generate the map. 190  
The divergence between these curves indicates that the regression fails to extract the correct 191  
values for the epistatic coefficients. 192

This can also be seen by examining the values of the extracted epistatic coefficients. The 193  
blue curve in Fig 1C shows the estimated value of a single, pairwise epistatic coefficient 194  
within the high-order model as data are added to the training set. The gray line shows the 195  
coefficient used to generate the map. Rather than monotonically converging to the true value, 196  
the estimated coefficient fluctuates in both magnitude and sign as data are added. This was 197  
common for all coefficients. We found that, on average, 65% of the pairwise coefficients 198  
flipped signs as data was added to our model. 199

These observations were robust to the choice of epistatic model and regression method. 200  
We used the Hadamard epistatic model with lasso regression for the results shown, but 201  
obtained identical results for all combinations of the Hadamard and biochemical epistatic 202  
models with ordinary, lasso, or ridge regression (see methods, Fig S2). 203

| ID   | genotype           | phenotype                        | $L$ | reference                |
|------|--------------------|----------------------------------|-----|--------------------------|
| I    | genomic mutations  | <i>E. coli</i> fitness           | 5   | (Khan et al., 2011)      |
| II   | point mutants      | bacterial fitness                | 5   | (Weinreich et al., 2006) |
| III  | chromosomes        | <i>A. niger</i> fitness          | 5   | (de Visser et al., 2009) |
| IV   | point mutants      | binding affinity                 | 5   | (Anderson et al., 2015)  |
| V    | alleles in network | <i>S. cerevisiae</i> growth rate | 6   | (Hall et al., 2010)      |
| VI   | alleles in network | <i>S. cerevisiae</i> growth rate | 6   | (Hall et al., 2010)      |
| VII  | genomic mutations  | <i>E. coli</i> fitness           | 5   | (Flynn et al., 2013)     |
| VIII | genomic mutations  | <i>E. coli</i> fitness           | 5   | (Flynn et al., 2013)     |
| IX   | chromosomes        | <i>A. niger</i> fitness          | 5   | (de Visser et al., 2009) |
| X    | alleles in network | <i>S. cerevisiae</i> sporulation | 6   | (Hall et al., 2010)      |
| XI   | alleles in network | <i>S. cerevisiae</i> mating      | 6   | (Hall et al., 2010)      |
| XII  | genomic mutations  | <i>E. coli</i> fitness           | 6   | (Palmer et al., 2015)    |

Table 1: **Published experimental genotype-phenotype maps.**

## Predictive epistatic models cannot be extracted from experimental genotype-phenotype maps

We next asked whether experimental genotype-phenotype maps exhibited similar bias in their regressed epistatic coefficients. We analyzed 12 experimentally characterized genotype-phenotype maps (Table 1). All maps contained all combinations of  $L$  mutations, ranging in size from 32 to 128 genotypes. The maps consisted of very different classes of genotypes: collections of point mutations within a single gene, scattered genomic point mutations, or alternate alleles of genes in a metabolic network. The measured phenotypes are also diverse: competitive fitness, binding affinity, and parameters like growth rate and sporulation efficiency.

We started by linearizing the experimental genotype-phenotype maps (see methods) (Sailer and Harms, 2017a; Otwinowski et al., 2018). We then dissected each map into linear epistatic coefficients. Because all genotype-phenotype pairs in these maps have been measured, we have the same number of observations as epistatic coefficients. We can therefore decompose epistasis into linear coefficients using a matrix transformation (Heckendorn and Whitley, 1999; Poelwijk et al., 2016), avoiding complications arising from regression. We found that all of these maps exhibited statistically significant pairwise and high-order

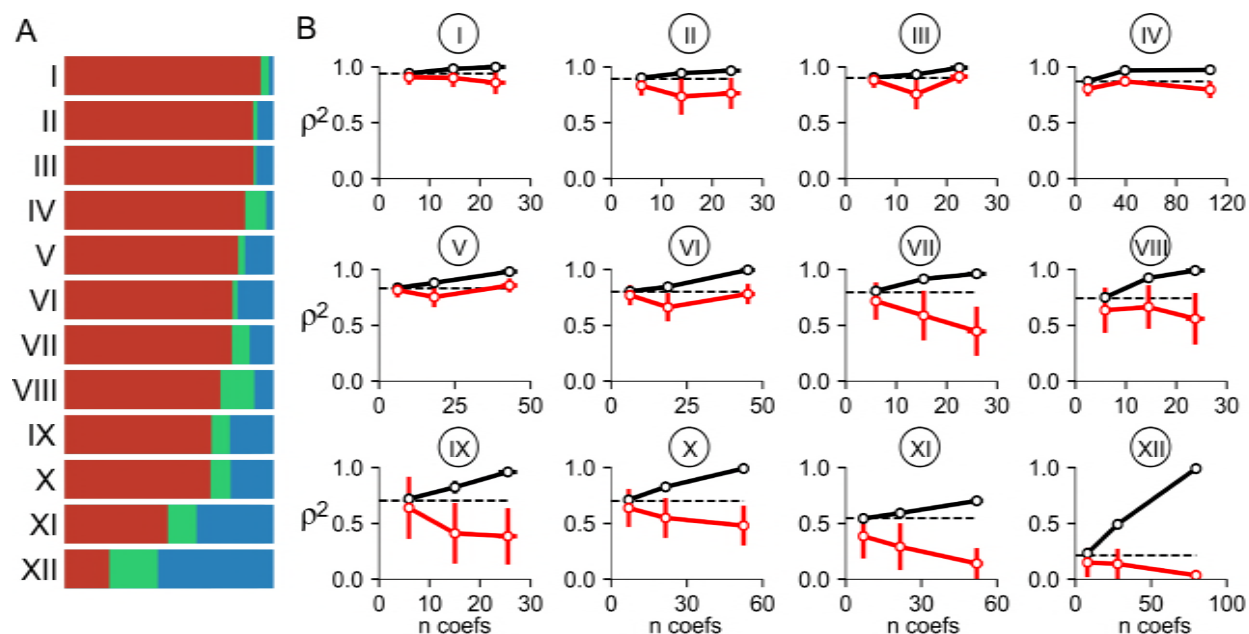

**Figure 2: Predictive epistatic coefficients cannot be resolved from experimental genotype-phenotype maps.** A) Bars show the fraction of variation in phenotype explained by additive effects (red), pairwise epistasis (green), or any order of high-order epistasis (blue). Each bar is for one of the twelve experimental genotype-phenotype maps. B) Each sub-panel shows  $\rho_{train}^2$  (black) and  $\rho_{test}^2$  (red) for the map indicated above the graph as epistatic orders are added to the model. The x-axis is the number of parameters used in the fit. Points are, from left to right: additive, pairwise, and high-order epistasis. Points and lines indicate the mean of 1,000 pseudoreplicate samples. Error bars are standard deviation of pseudoreplicate results. The dashed lines indicate the fraction of the variation in the map explained by the additive model. These fits used the Hadamard model with lasso regression. See Fig S3 for other epistatic models and regression strategies.

epistatic interactions. Epistasis contributed from 6% to 79% of the variation in these maps 221  
(Fig 2A). 222

We next probed our ability to extract predictive epistatic coefficients from the linearized 223  
maps. We created a training set consisting of 80% of the genotype-phenotype pairs in each 224  
map, regressed models against this set of observations, and then predicted the phenotypes of 225  
the remaining 20% of the genotypes. As above, we fit the additive, pairwise and high-order 226  
models. We then repeated this for 1,000 pseudo-replicate training and test sets on each map. 227

As with our simulations, we found we could not reliably extract predictive epistatic 228  
coefficients (Fig 2B). In 11 of 12 maps, the additive model performed better than any other 229

model. In seven of the twelve maps (I, VII, VIII, IX, X, XI, and XII),  $\rho_{test}^2$  consistently 230  
decreased with each addition of epistatic coefficients. In four of the maps (II, III, V, and 231  
VI) the addition of pairwise epistasis led to a drop in  $\rho_{test}^2$  that was partially offset by the 232  
addition of high-order coefficients. Ultimately, however, the high-order model did no better 233  
than the additive model in these maps. Map IV was the the only map in which adding 234  
epistatic coefficients had any positive effect: the addition of pairwise epistasis led to a small 235  
increase in  $\rho_{test}^2$  (from 0.80 to 0.87). This is achieved, however, by increasing the number of 236  
fit parameters from 10 to 40, implying that each epistatic coefficient contributed very little 237  
to the overall model. As with the simulated maps, these observations were robust to the 238  
choice of epistatic model and regression strategy (Fig S3). 239

## Experimental epistatic coefficients cannot be distinguished from a 240 random model 241

These results indicate that predictive, linear epistatic coefficients cannot be estimated by 242  
regression in these genotype-phenotype maps. We must characterize essentially every pheno- 243  
type in a genotype-phenotype map to resolve the epistatic coefficients that describe the map. 244  
But, if we have measured every phenotype, there are no more phenotypes to predict. One 245  
might conclude that understanding epistasis requires measuring *every* genotype-phenotype 246  
pair in a map. 247

Given the effort required to measure every phenotype, we posed another question: is it 248  
worth exhaustively characterizing a map just to extract epistatic coefficients? Or, put dif- 249  
ferently, are the epistatic coefficients one can decompose from a complete map informative? 250  
We approached this question by comparing the epistatic coefficients extracted from an ex- 251  
perimental genotype-phenotype map to those extracted from a null model. Our null model 252  
was a random map: we generated phenotypes with an additive model and then perturbed 253  
each phenotype by a random value drawn from a normal distribution centered at zero. This 254

is an appropriate null model because the generating model has no mechanistic interactions 255  
at all; any correlations between mutations arise from noise. Such a map consists entirely of 256  
“statistical” epistasis (Cordell, 2002). 257

We decomposed the epistasis in Map VIII using all 32 measured phenotypes and compared 258  
the resulting epistasis to our null model. Fig 3A-C shows the epistasis extracted from the 259  
experimental map. In this map 26% of the variation in phenotype is due to epistasis (Fig 260  
3B). The residuals between the additive model and the observed phenotypes are normally 261  
distributed (Fig 3B). When we decompose the epistasis, we find that pairwise coefficients 262  
capture 16.2% and high-order coefficients capture 9.2% of the variation in phenotype. 263

We next constructed our null map. We generated a collection of random additive co- 264  
efficients and calculated  $P_{add}$  for each genotype. We then added random perturbations to 265  
each phenotype, drawn from a normal distribution with a mean of 0 and a standard devia- 266  
tion selected to yield a total magnitude of epistasis similar to the experimental map. This 267  
sampling procedure gave the  $P_{obs}$  vs.  $P_{add}$  curve shown in Fig 3E. As with the experimental 268  
map, epistasis accounted for 26% of the total variation in the map. We then decomposed 269  
this random epistasis with a high-order epistasis model (Fig 3F). 270

The overall structure of epistasis is indistinguishable between the experimental and a 271  
random map, even though the values of the specific epistatic coefficients are different (Fig 272  
3C vs. F). If we generate many random maps—effectively, sampling over the possible config- 273  
urations of epistatic coefficients that arise from a random variation in phenotype—we cannot 274  
distinguish the experimental map from among the decoys (Fig S4). This suggests that the 275  
linear epistatic coefficients extracted from this map should be viewed as decompositions of 276  
random noise, unless this can be shown otherwise. 277

## Using an additive model to treat epistasis 278

Our results speak against decomposing epistasis into collections of linear interaction 279  
terms. So how should we treat epistasis? We will touch on nonlinear treatments in the 280

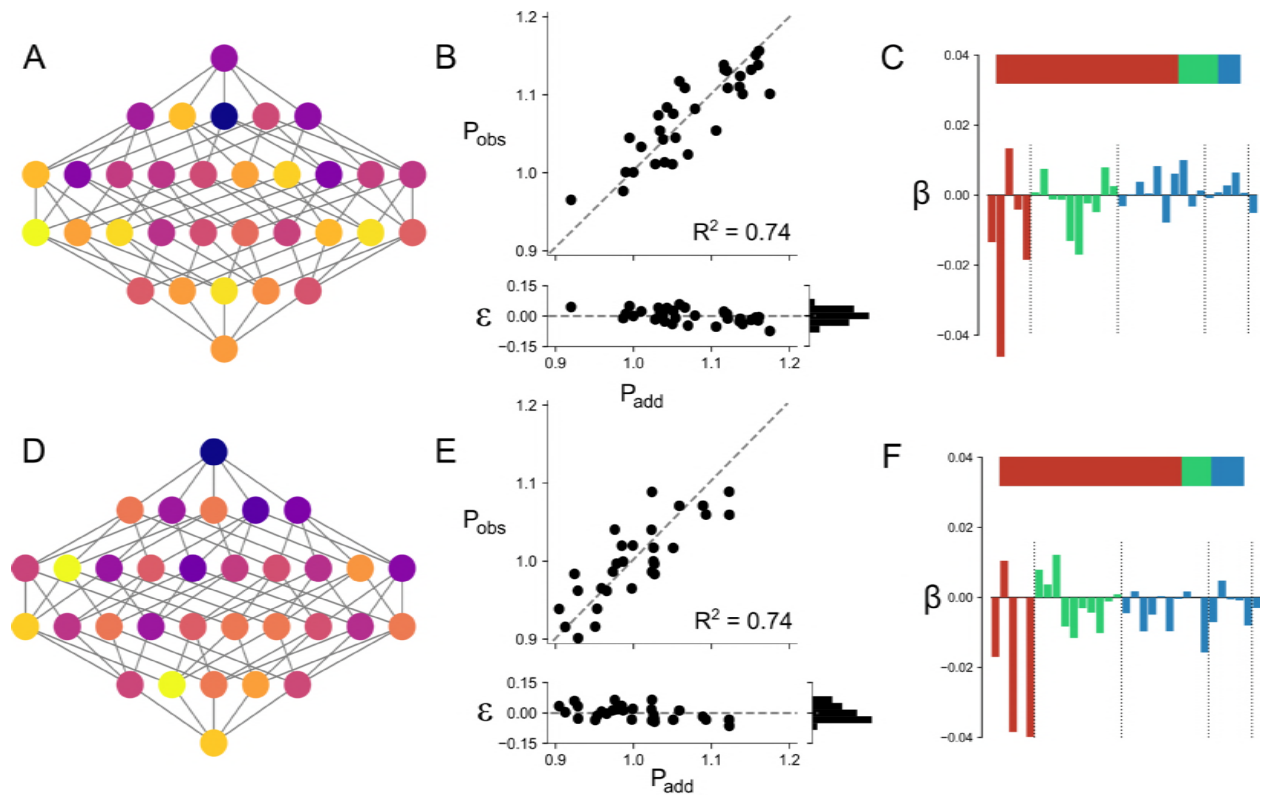

Figure 3: **Experimental maps resemble random maps.** Panels A and D show genotype-phenotype maps. Each node is a genotype; each edge is a single point mutation. Colors indicate quantitative phenotype. Panels B and E show the correlation between the observed phenotypes and the additive model, with fit residuals shown below the plot. Panels C and F indicate the magnitude of epistasis in each map as in Fig 2A (top subpanel) and the values of all model coefficients (bottom subpanel). Colors indicate additive components (red), pairwise components (green), and high-order components (blue). Each bar shows the value of a single model coefficient: the red bars correspond to the 5 additive coefficients, the green bars to the 10 pairwise coefficients, and the blue bars to the 17 high-order coefficients. Panels A-C are for experimental map VIII; panels D-F are for a simulated map with random epistasis.



discussion, but before doing so, we will explore our top-performing epistasis model from 281  
above: the additive model. 282

The additive model treats epistasis as residual variation not explicitly accounted for by 283  
the model. If we measure the phenotypes of a set of combinatorial genotypes, we observe the 284  
effect of each mutation in a large number of genetic backgrounds (Fig 4A). We can describe 285  
the effect of mutation  $i$  with two numbers, its average effect  $\langle\beta_i\rangle$  and the variance of its 286  
effect  $\sigma_i^2$ . This same logic applies at the level of whole genotypes. If we have linearized the 287  
genotype-phenotype map (Szendro et al., 2013; Sailer and Harms, 2017a; Otwinowski et al., 288  
2018), the residuals between  $\vec{P}_{\text{obs}}$  and  $\vec{P}_{\text{add}}$  will be normally distributed (Fig 3B). As a result, 289  
the phenotype of a genotype  $g$  is given by: 290

$$P_{\text{obs},g} = P_{\text{add},g} \pm \xi \quad (6)$$

where  $\xi$  is the standard deviation of the residuals between  $\vec{P}_{\text{obs}}$  and  $\vec{P}_{\text{add}}$ . This is the basic 291  
definition of epistasis given by Fisher (Fisher, 1918), applied across the whole map. 292

This view is particularly useful for predicting unmeasured phenotypes. First: it means 293  
each predicted phenotype has a known, normally distributed uncertainty. Even if a large 294  
amount of variation remains unexplained by the additive model, it is safely partitioned into 295  
a random normal distribution. Put another way,  $\xi$  acts as a prediction interval. Second: 296  
because the additive model has few terms, we can train it using a very small amount of data. 297

Following this line of reasoning, we asked how many phenotypes we would have to measure 298  
to construct a maximally predictive additive model. We constructed additive maps with 299  
different alphabet sizes (ranging from 2 to 5) and numbers of mutations (ranging from 6 to 300  
8). We then injected random epistasis ranging in magnitude from 10% to 60% of the variation 301  
in the phenotype. We simulated experiments where we measured one random genotype at a 302  
time, added it to our observations, and predicted the phenotypes of the remaining genotypes. 303  
We then plotted  $\rho_{\text{test}}^2$  as a function of the average number of times we saw each individual 304



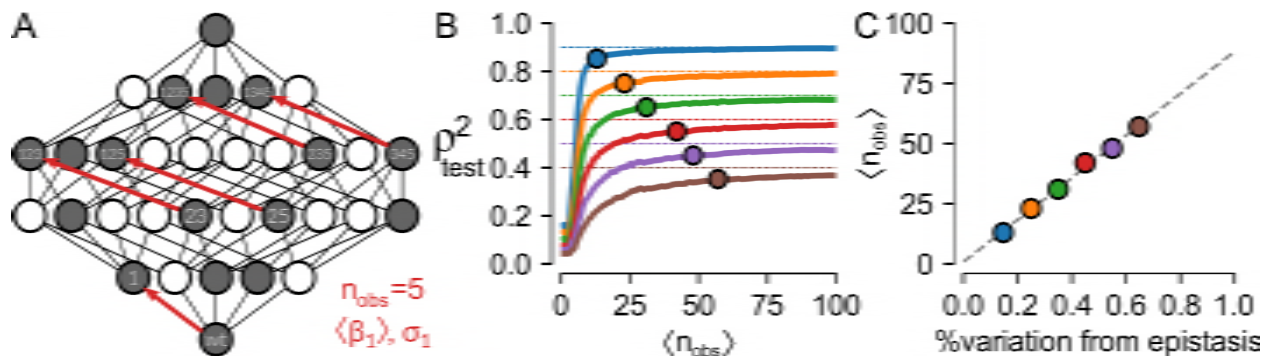

Figure 4: **Epistasis as uncertainty.** A) A partially characterized map. Circles represent genotypes, some of which have been measured (filled), some of which have not (unfilled). Lines represent single point mutations. Given these observations, we measure the effect of mutation 1 in five different backgrounds (red arrows) and can thus calculate the mean and variance in its effect across the map ( $\langle\beta_1\rangle$  and  $\sigma_1$ ). B)  $\rho_{test}^2$  versus the average number of times each mutation is seen in randomly sampled genotype-phenotype maps with epistasis responsible for 10% (blue) to 60% (brown) of the variation in the maps. Points indicate where  $\rho_{test}^2$  is within 5% of the maximum predictive power of the additive model. C) A calibration curve indicating how many times, on average, one must observe each mutation in map to resolve the additive coefficients in a map with different fractions of epistasis.

mutation across all genetic backgrounds ( $\langle n_{obs} \rangle$ ). 305

When plotted as a function of  $\langle n_{obs} \rangle$ ,  $\rho_{test}^2$  rapidly rises and then saturates at the mag- 306  
 nitude of the epistasis in the map, independent of alphabet size and number of mutations 307  
 (Fig 4B). We next asked, as a function of the magnitude of the epistasis in the map, when 308  
 our predictions would be within 0.05 of the best achievable  $\rho_{test}^2$ . This is indicated by the 309  
 points on Fig 4B. We plotted these values as a function of the magnitude of the epistasis in 310  
 the map. This reveals a linear relationship between the average number of times we need to 311  
 see each mutation and the total epistasis in the map (Fig 4C). 312

We set out to test this approach using a partially sampled, experimental genotype- 313  
 phenotype map characterizing the binding specificity of dCas9 to 23-base-pair oligonu- 314  
 cleotides (Fig 5A). The published experiment sampled 59,394 of the  $7 \times 10^{13}$  ( $4^{23}$ ) possible 315  
 oligonucleotides. Although all bases were sampled at all positions, there was significant bias 316  
 towards a specific base at each position in the library (Fig 5A). The map exhibited a highly 317  
 non-linear relationship between  $\vec{P}_{obs}$  and  $\vec{P}_{add}$  (Fig 5B), so we linearized the map with a 318

5th-order spline (Eq. 4), yielding normal residuals between  $\vec{P}_{\text{obs,linearized}}$  and  $\vec{P}_{\text{add}}$  (Fig 5C). 319  
We then assessed the predictive power of the map: we added genotypes individually to a 320  
training set and evaluated our ability to predict the test set. We found that we were able 321  
to fit a model using  $\approx 4,000$  genotypes to predict the remaining  $\approx 55,000$  measurements. 322  
Because of the biased sampling of genotypes in the map, it took 4,000 genotypes to observe 323  
each individual mutation a sufficient number of times to resolve the additive effects of all 324  
mutations (Fig 5D). Our prediction curve saturated after we had seen each mutation at least 325  
39 times. This is in good agreement with our calibration curve on simulated data, which 326  
indicated we would need to observe each mutation an average of 40 times (with random 327  
sampling) to saturate an additive model in which epistasis was responsible for 38% of the 328  
variation in the map. 329

The predictive power of this model is quite good considering its simplicity: we are able 330  
to predict any phenotype to  $\pm 38\%$  given we only sampled one, one-billionth of a percent 331  
of the map. Extensive epistasis remains, but it follows a normal distribution with a known 332  
standard deviation. While there are certainly more sophisticated models, an additive model 333  
provides significant predictive power for this map. 334

## Discussion 335

Our results suggest that a linear model should not be used to extract pairwise and 336  
multi-way interactions between mutations in a genotype-phenotype map. Regressed epistatic 337  
coefficients are biased (Fig 1B), unstable to the addition of new data (Fig 1C), and not 338  
useful for predicting unmeasured phenotypes (Fig 2A). Far from being an anomaly, this 339  
appears to be a shared feature of a collection of a dozen high-precision, combinatorially- 340  
complete genotype-phenotype maps (Fig 2B). Further, we can generate epistatic coefficients 341  
very similar to those observed in these maps using a simulated map in which we added 342  
random, normally distributed noise to each phenotype (Fig 3). This argues for viewing 343  
epistatic coefficients as uninterpretable decompositions of random variation, unless shown 344

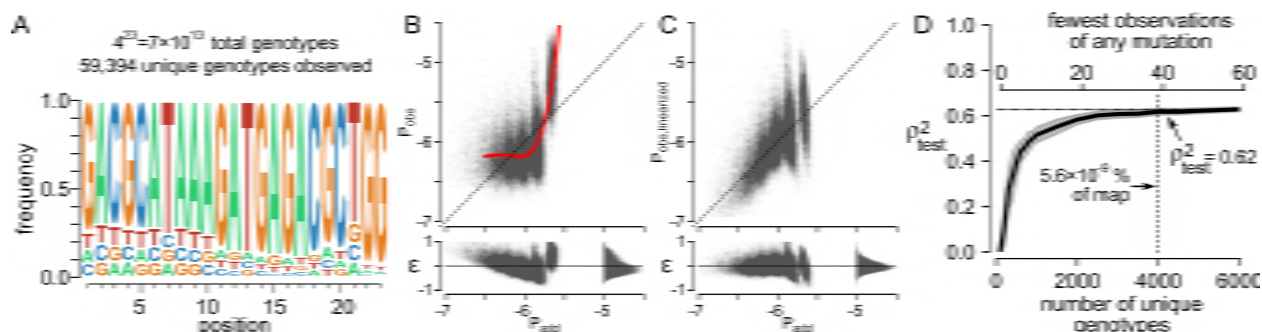

Figure 5: **A predictive, additive model can be trained on a large genotype-phenotype map.** A) Summary of the genotype-phenotype map reported in (Boyle et al., 2017). Map consists of 23 sites, each with four bases with the frequency at each site shown in the sequence logo. The total map has  $7 \times 10^{13}$  genotypes; the publication reports measured phenotypes for 59,394 genotypes. B) Raw  $P_{obs}$  vs.  $P_{add}$  plot for the map. Each point is a genotype. The fit residuals are shown below the main plot. We fit a 5th-order spline to linearize the map (red curve). C) The linearized form of the map, with epistasis removed using the spline shown in panel B. D) A predictive model can be trained using  $\approx 4,000$  genotypes. The bottom x-axis shows the number of unique genotypes used to train the model (sampled randomly); the top x-axis shows the fewest number of times any mutation was seen in that sample given the bias in the frequencies of the input mutations.  $\rho_{test}^2$  was measured against the remaining 50,000+ genotypes not used to train the model.

otherwise. 345

Viewed mechanistically, this is unsurprising. The epistatic models under investigation 346  
 assume linearity, but biology is nonlinear (Bershtein et al., 2006; Lehner, 2011; Chou et al., 347  
 2011; Tokuriki et al., 2012; Schenk et al., 2013; Sailer and Harms, 2017a; Otwinowski et al., 348  
 2018). There is no reason to believe that a linear model will capture a complicated non- 349  
 linear system in a predictive and interpretable way. For example, we showed recently that 350  
 we could generate high-order epistasis using a toy thermodynamic model of proteins with 351  
 only explicit pairwise interactions (Sailer and Harms, 2017b). The epistasis arise because 352  
 mutations have a nonlinear effect on the relative populations of individual protein conform- 353  
 ations. As a result, epistatic coefficients cannot be interpreted mechanistically—they are 354  
 purely “statistical” (Cordell, 2002). 355

Further, our results indicate that the signs and magnitudes of specific epistatic interac- 356  
 tions extracted from genotype-phenotype maps have no universal meaning. For example, 357

in Fig 1C, the selected pairwise coefficient flips between positive, zero, and negative. If 358  
different genotypes of the map are characterized, we obtain different values for the pairwise 359  
coefficient, and thus a different interpretation for the effect of epistasis on the phenotype. 360

## Treating epistasis with an additive model 361

A simple way to treat epistasis is as the residual variation after fitting an additive model (Eq. 362  
6). Despite its simplicity, this is a useful perspective. It can be used to predict unmeasured 363  
phenotypes in a genotype-phenotype map with known uncertainty. This is because deviation 364  
from the additive model is determined by the magnitude of epistasis in the map (Fig 4A). 365  
Further, the simplicity of the model means we can characterize an extremely sparse sample 366  
of combinations of mutations across a genotype-phenotype map and still predict missing 367  
phenotypes (Fig 4C). 368

This suggests that sparsely sampling combinatorial genotypes, rather than aiming to 369  
exhaustively characterize point mutants, may be a powerful way to understand and predict 370  
genotype-phenotype maps. As long as each mutation is seen across a sufficiently large number 371  
of genetic backgrounds, we can resolve its average effect across a volume of the genotype- 372  
phenotype map. In contrast, exhaustively sampling point mutations in a single background— 373  
such as a deep mutational scan—will yield mutational effects specific to whatever genetic 374  
background is used. Epistasis is not averaged out, meaning such coefficients should not 375  
provide high predictive power when mutations are combined. 376

Interpretation of epistasis as a prediction interval only holds when the fit residuals 377  
are normally distributed about zero. Curvature between  $\vec{P}_{\text{obs}}$  and  $\vec{P}_{\text{add}}$  will lead to non- 378  
normal residuals and, thus, a distorted picture of the uncertainty (Sailer and Harms, 2017a; 379  
Otwinowski et al., 2018). Multiple methods exist for linearizing genotype-phenotype maps, 380  
including taking the log of phenotypes (Cordell, 2002), power transforms (Sailer and Harms, 381  
2017a), splines (Otwinowski et al., 2018), and even mechanistic models (Schenk et al., 2013; 382  
Otwinowski, 2018). This is one area for improvement, as better global models will decrease 383  
the amount of variation that must be explained by the additive model. For example, in 384

our analysis of the dCas9 binding specificity, there is still structure in the residuals, with 385  
some clustering along  $P_{add}$  despite linearization using an 5th-order spline (Fig 5C). A model 386  
that captures such variation could improve predictive power. Further improvement of global 387  
models will thus be an important area of investigation. 388

## Moving away from linear models 389

We see three promising ways forward. The first is to view epistasis in terms of its conse- 390  
quences for evolutionary trajectories. This includes metrics like the number of accessible 391  
trajectories, number of fitness peaks, and summary statistics such as the roughness to slope 392  
ratio (Szendro et al., 2013; Ferretti et al., 2018; Crona et al.). These metrics generally do 393  
not allow prediction of unmeasured phenotypes nor mechanistic understanding of the map, 394  
but can provide useful insights into evolutionary trajectories and outcomes without the poor 395  
behavior observed in linear epistasis models. 396

The second is to use non-biological, nonlinear models to extract information from each 397  
map. These include tools such as Potts models (Figliuzzi et al., 2016; Hopf et al., 2017), 398  
variational auto encoders (Riesselman et al., 2017; Sinai et al., 2017), and neural networks 399  
(Wang et al., 2017; Ma et al., 2018). Such approaches can yield predictive models of genotype- 400  
phenotype maps, and will no doubt continue to grow in popularity and sophistication. One 401  
downside to these models is a requirement for massive amounts of training data—which may 402  
not always be feasible, even in the modern high-throughput era. Further, it may be difficult 403  
to link such models to an underlying biological mechanism. 404

The third is to attempt to model the underlying mechanistic process that leads to the 405  
map (Tokuriki et al., 2012; Schenk et al., 2013; Otwinowski, 2018; Dutta et al., 2018). 406  
Rather than taking a “top-down” approach, in which one dissects epistasis into statistical 407  
interactions that are hopefully meaningful, one can instead take a “bottom-up” approach, 408  
in which one calculates phenotypes from genotypes using a mechanistic biological model. 409

This model can then be trained against measured phenotypes. This provides a predictive 410  
model for unmeasured phenotypes, as well as providing mechanistic insight into map between 411  
genotype and phenotype. A good example is that of Schenk et al, who dissected a genotype- 412  
phenotype map by explicitly modeling the effect of each mutation on protein stability and 413  
enzymatic activity (Schenk et al., 2013). This model captured extensive variation in the map 414  
that could not be described with a linear model, while also providing mechanistic insight 415  
into the protein under investigation. 416

## Conclusion 417

Epistasis was described by Fisher as residual variation left over after fitting an additive 418  
model (Fisher, 1918). While it may sometimes be productive to separate these residuals into 419  
specific statistical coefficients, a better approach is to build better model. In our view, the 420  
long-term goal should not be interpreting epistatic interactions between mutations; rather, 421  
the long-term goal should be building mechanistic models that fit experimental observations 422  
and, ultimately, make epistasis disappear. 423

## Acknowledgements 424

We would like to thank members of the Harms lab for helpful discussions and comments. 425  
Work was supported by start up funds from the University of Oregon (ZRS). MJH is a Pew 426  
Scholar in the Biomedical Sciences, supported by The Pew Charitable Trusts. 427

## References

- Dave W. Anderson, Alesia N. McKeown, and Joseph W. Thornton. Intermolecular Epistasis Shaped the Function and Evolution of an Ancient Transcription Factor and Its DNA Binding Sites. *eLife Sciences*, page e07864, June 2015. ISSN 2050-084X. doi: 10.7554/eLife.07864.
- Shimon Bershtein, Michal Segal, Roy Bekerman, Nobuhiko Tokuriki, and Dan S. Tawfik. Robustness–epistasis Link Shapes the Fitness Landscape of a Randomly Drifting Protein. *Nature*, 444(7121):929–932, December 2006. ISSN 0028-0836. doi: 10.1038/nature05385.
- G. E. P. Box and D. R. Cox. An Analysis of Transformations. *Journal of the Royal Statistical Society. Series B (Methodological)*, 26(2):211–252, 1964. ISSN 0035-9246.
- Evan A. Boyle, Johan O. L. Andreasson, Lauren M. Chircus, Samuel H. Sternberg, Michelle J. Wu, Chantal K. Guegler, Jennifer A. Doudna, and William J. Greenleaf. High-throughput biochemical profiling reveals sequence determinants of dCas9 off-target binding and unbinding. *Proceedings of the National Academy of Sciences*, page 201700557, May 2017. ISSN 0027-8424, 1091-6490. doi: 10.1073/pnas.1700557114. URL <http://www.pnas.org/content/early/2017/05/09/1700557114>.
- Yvonne H. Chan, Sergey V. Venev, Konstantin B. Zeldovich, and C. Robert Matthews. Correlation of fitness landscapes from three orthologous TIM barrels originates from sequence and structure constraints. *Nature Communications*, 8:14614, March 2017. ISSN 2041-1723. doi: 10.1038/ncomms14614. URL <https://www.nature.com/articles/ncomms14614>.
- Hsin-Hung Chou, Hsuan-Chao Chiu, Nigel F. Delaney, Daniel Segrè, and Christopher J. Marx. Diminishing Returns Epistasis Among Beneficial Mutations Decelerates Adaptation. *Science*, 332(6034):1190–1192, March 2011. ISSN 0036-8075, 1095-9203. doi: 10.1126/science.1203799.



- Heather J. Cordell. Epistasis: what it means, what it doesn't mean, and statis- 452  
tical methods to detect it in humans. *Human Molecular Genetics*, 11(20):2463– 453  
2468, October 2002. ISSN 0964-6906. doi: 10.1093/hmg/11.20.2463. URL 454  
<https://academic.oup.com/hmg/article/11/20/2463/616080>. 455
- Kristina Crona, Alex Gavryushkin, Devin Greene, and Niko Beeren- 456  
winkel. Inferring genetic interactions from comparative fitness data. 457  
*eLife*, 6. ISSN 2050-084X. doi: 10.7554/eLife.28629. URL 458  
<https://www.ncbi.nlm.nih.gov/pmc/articles/PMC5737811/>. 459
- James F. Crow. On Epistasis: Why It Is Unimportant in Polygenic Directional Selection. 460  
*Philosophical Transactions of the Royal Society of London B: Biological Sciences*, 365 461  
(1544):1241–1244, April 2010. ISSN 0962-8436, 1471-2970. doi: 10.1098/rstb.2009.0275. 462
- J. Arjan G. M. de Visser and Joachim Krug. Empirical Fitness Landscapes and the Pre- 463  
dictability of Evolution. *Nat Rev Genet*, 15(7):480–490, July 2014. ISSN 1471-0056. doi: 464  
10.1038/nrg3744. 465
- J. Arjan G. M. de Visser, Su-Chan Park, and Joachim Krug. Exploring the Effect of Sex 466  
on Empirical Fitness Landscapes. *The American Naturalist*, 174(s1):S15–S30, July 2009. 467  
ISSN 0003-0147, 1537-5323. doi: 10.1086/599081. 468
- Júlia Domingo, Guillaume Diss, and Ben Lehner. Pairwise and higher-order ge- 469  
netic interactions during the evolution of a tRNA. *Nature*, 558(7708):117– 470  
121, June 2018. ISSN 1476-4687. doi: 10.1038/s41586-018-0170-7. URL 471  
<https://www.nature.com/articles/s41586-018-0170-7>. 472
- Michael B. Doud and Jesse D. Bloom. Accurate Measurement of the Effects of All 473  
Amino-Acid Mutations on Influenza Hemagglutinin. *Viruses*, 8(6):155, June 2016. doi: 474  
10.3390/v8060155. URL <http://www.mdpi.com/1999-4915/8/6/155>. 475



- Sandipan Dutta, Jean-Pierre Eckmann, Albert Libchaber, and Tsvi Tlusty. Green function of correlated genes in a minimal mechanical model of protein evolution. *Proceedings of the National Academy of Sciences*, 115(20):E4559–E4568, May 2018. ISSN 0027-8424, 1091-6490. doi: 10.1073/pnas.1716215115. URL <http://www.pnas.org/content/115/20/E4559>.
- Luca Ferretti, Daniel Weinreich, Fumio Tajima, and Guillaume Achaz. Evolutionary constraints in fitness landscapes. *Heredity*, page 1, July 2018. ISSN 1365-2540. doi: 10.1038/s41437-018-0110-1. URL <https://www.nature.com/articles/s41437-018-0110-1>.
- Matteo Figliuzzi, Hervé Jacquier, Alexander Schug, Oliver Tenaillon, and Martin Weigt. Coevolutionary Landscape Inference and the Context-Dependence of Mutations in Beta-Lactamase TEM-1. *Molecular Biology and Evolution*, 33(1):268–280, January 2016. ISSN 0737-4038. doi: 10.1093/molbev/msv211. URL <https://academic.oup.com/mbe/article/33/1/268/2579532>.
- R.A. Fisher. The Correlation between Relatives on the Supposition of Mendelian Inheritance. *Philosophical Transactions of the Royal Society of Edinburgh*, (52):399–433, 1918.
- Kenneth M. Flynn, Tim F. Cooper, Francisco B.-G. Moore, and Vaughn S. Cooper. The Environment Affects Epistatic Interactions to Alter the Topology of an Empirical Fitness Landscape. *PLOS Genet*, 9(4):e1003426, April 2013. ISSN 1553-7404. doi: 10.1371/journal.pgen.1003426.
- Douglas M. Fowler, Carlos L. Araya, Sarel J. Fleishman, Elizabeth H. Kellogg, Jason J. Stephany, David Baker, and Stanley Fields. High-Resolution Mapping of Protein Sequence-Function Relationships. *Nature Methods*, 7(9):741–746, September 2010. ISSN 1548-7091. doi: 10.1038/nmeth.1492.
- David W. Hall, Matthew Agan, and Sara C. Pope. Fitness Epistasis among 6 Biosynthetic

- Loci in the Budding Yeast *Saccharomyces Cerevisiae*. *J Hered*, 101(suppl 1):S75–S84, 500  
January 2010. ISSN 0022-1503, 1465-7333. doi: 10.1093/jhered/esq007. 501
- Robert B. Heckendorn and Darrell Whitley. Predicting Epistasis from Mathematical 502  
Models. *Evolutionary Computation*, 7(1):69–101, March 1999. ISSN 1063-6560. doi: 503  
10.1162/evco.1999.7.1.69. 504
- Thomas A. Hopf, John B. Ingraham, Frank J. Poelwijk, Charlotta P. I. Schärfe, Michael 505  
Springer, Chris Sander, and Debora S. Marks. Mutation effects predicted from sequence 506  
co-variation. *Nature Biotechnology*, 35(2):128–135, February 2017. ISSN 1546-1696. doi: 507  
10.1038/nbt.3769. URL <https://www.nature.com/articles/nbt.3769>. 508
- Amnon Horovitz. Double-Mutant Cycles: A Powerful Tool for Analyzing Protein Structure 509  
and Function. *Folding and Design*, 1(6):R121–R126, December 1996. ISSN 1359-0278. 510  
doi: 10.1016/S1359-0278(96)00056-9. 511
- J. D. Hunter. Matplotlib: A 2d Graphics Environment. *Computing in Science Engineering*, 512  
9(3):90–95, May 2007. ISSN 1521-9615. doi: 10.1109/MCSE.2007.55. 513
- Aisha I. Khan, Duy M. Dinh, Dominique Schneider, Richard E. Lenski, and Tim F. Cooper. 514  
Negative Epistasis Between Beneficial Mutations in an Evolving Bacterial Population. 515  
*Science*, 332(6034):1193–1196, March 2011. ISSN 0036-8075, 1095-9203. doi: 10.1126/sci- 516  
ence.1203801. 517
- Ben Lehner. Molecular mechanisms of epistasis within and between genes. *Trends in Ge-* 518  
*netics*, 27(8):323–331, August 2011. ISSN 0168-9525. doi: 10.1016/j.tig.2011.05.007. URL 519  
<http://www.sciencedirect.com/science/article/pii/S0168952511000771>. 520
- Jianzhu Ma, Michael Ku Yu, Samson Fong, Keiichiro Ono, Eric Sage, Barry Demchak, 521  
Roded Sharan, and Trey Ideker. Using deep learning to model the hierarchical structure 522  
and function of a cell. *Nature Methods*, 15(4):290–298, April 2018. ISSN 1548-7105. doi: 523

- 10.1038/nmeth.4627. URL <https://www.nature.com/articles/nmeth.4627/>. 524
- Wes McKinney. Data Structures for Statistical Computing in Python. pages 51–56, 2010. 525  
URL <http://conference.scipy.org/proceedings/scipy2010/mckinney.html>. 526
- Charlotte M. Miton and Nobuhiko Tokuriki. How Mutational Epistasis Impairs Predictability 527  
in Protein Evolution and Design. *Protein Science*, 25(7):1260–1272, July 2016. ISSN 1469- 528  
896X. doi: 10.1002/pro.2876. 529
- Matt Newville, Renee Otten, Andrew Nelson, Antonino Ingargiola, Till Stensitzki, Dan Al- 530  
lan, Austin Fox, Michał, Glenn, Yoav Ram, MerlinSmiles, Li Li, Christoph Deil, Stuermer, 531  
Alexandre Beelen, Oliver Frost, gasquev, Allan L. R. Hansen, Alexander Stark, Tim 532  
Spillane, Shane Caldwell, Anthony Polloreno, andrewhannum, colgan, Robbie Clarken, 533  
Kostis Anagnostopoulos, Jose Borreguero, deep 42-thought, Ben Gamari, and Anthony 534  
Almarza. lmfit/lmfit-py 0.9.11, June 2018. URL <https://zenodo.org/record/1301254>. 535
- Ákos Nyerges, Bálint Csörgő, Gábor Draskovits, Bálint Kintses, Petra Szili, Györgyi Fer- 536  
enc, Tamás Révész, Eszter Ari, István Nagy, Balázs Bálint, Bálint Márk Vásárhelyi, 537  
Péter Bihari, Mónika Számel, Dávid Balogh, Henrietta Papp, Dorottya Kalapis, Balázs 538  
Papp, and Csaba Pál. Directed evolution of multiple genomic loci allows the predic- 539  
tion of antibiotic resistance. *Proceedings of the National Academy of Sciences*, page 540  
201801646, June 2018. ISSN 0027-8424, 1091-6490. doi: 10.1073/pnas.1801646115. URL 541  
<http://www.pnas.org/content/early/2018/05/30/1801646115>. 542
- Jakub Otwinowski. Biophysical inference of epistasis and the effects of mutations 543  
on protein stability and function. *arXiv:1802.08744 [q-bio]*, February 2018. URL 544  
<http://arxiv.org/abs/1802.08744>. arXiv: 1802.08744. 545
- Jakub Otwinowski and Joshua B. Plotkin. Inferring Fitness Landscapes by Regression Pro- 546  
duces Biased Estimates of Epistasis. *PNAS*, 111(22):E2301–E2309, March 2014. ISSN 547

- 0027-8424, 1091-6490. doi: 10.1073/pnas.1400849111. 548
- Jakub Otwinowski, David M. McCandlish, and Joshua B. Plotkin. Inferring the shape 549  
of global epistasis. *Proceedings of the National Academy of Sciences*, page 201804015, 550  
July 2018. ISSN 0027-8424, 1091-6490. doi: 10.1073/pnas.1804015115. URL 551  
<http://www.pnas.org/content/early/2018/07/19/1804015115>. 552
- Adam C. Palmer, Erdal Toprak, Michael Baym, Seungsoo Kim, Adrian Veres, Shimon 553  
Bershtein, and Roy Kishony. Delayed Commitment to Evolutionary Fate in Antibiotic 554  
Resistance Fitness Landscapes. *Nature Communications*, 6:7385, June 2015. ISSN 2041- 555  
1723. doi: 10.1038/ncomms8385. 556
- F. Pedregosa, G. Varoquaux, A. Gramfort, V. Michel, B. Thirion, O. Grisel, M. Blon- 557  
del, P. Prettenhofer, R. Weiss, V. Dubourg, J. Vanderplas, A. Passos, D. Cournapeau, 558  
M. Brucher, M. Perrot, and E. Duchesnay. Scikit-learn: Machine Learning in Python. 559  
*Journal of Machine Learning Research*, 12:2825–2830, 2011. 560
- F. Perez and B. E. Granger. IPython: A System for Interactive Scientific Comput- 561  
ing. *Computing in Science Engineering*, 9(3):21–29, May 2007. ISSN 1521-9615. doi: 562  
10.1109/MCSE.2007.53. 563
- Patrick C. Phillips. Epistasis — the Essential Role of Gene Interactions in the Structure 564  
and Evolution of Genetic Systems. *Nat Rev Genet*, 9(11):855–867, November 2008. ISSN 565  
1471-0056. doi: 10.1038/nrg2452. 566
- Anna I. Podgornaia and Michael T. Laub. Pervasive degeneracy and epis- 567  
tasis in a protein-protein interface. *Science*, 347(6222):673–677, February 568  
2015. ISSN 0036-8075, 1095-9203. doi: 10.1126/science.1257360. URL 569  
<http://science.sciencemag.org/content/347/6222/673>. 570
- Frank J. Poelwijk, Vinod Krishna, and Rama Ranganathan. The Context-Dependence 571

- of Mutations: A Linkage of Formalisms. *PLOS Computational Biology*, 12(6): 572  
e1004771, June 2016. ISSN 1553-7358. doi: 10.1371/journal.pcbi.1004771. URL 573  
<http://journals.plos.org/ploscompbiol/article?id=10.1371/journal.pcbi.1004771> 574
- Frank J. Poelwijk, Michael Socolich, and Rama Ranganathan. Learning the pattern of epista- 575  
sis linking genotype and phenotype in a protein. *bioRxiv*, page 213835, November 2017. doi: 576  
10.1101/213835. URL <https://www.biorxiv.org/content/early/2017/11/03/213835>. 577
- Adam J. Riesselman, John B. Ingraham, and Debora Susan Marks. 578  
Deep generative models of genetic variation capture mutation effects. 579  
*bioRxiv*, page 235655, December 2017. doi: 10.1101/235655. URL 580  
<https://www.biorxiv.org/content/early/2017/12/18/235655.1>. 581
- Marylyn D. Ritchie, Lance W. Hahn, Nady Roodi, L. Renee Bailey, William D. Dupont, 582  
Fritz F. Parl, and Jason H. Moore. Multifactor-Dimensionality Reduction Reveals High- 583  
Order Interactions among Estrogen-Metabolism Genes in Sporadic Breast Cancer. *The* 584  
*American Journal of Human Genetics*, 69(1):138–147, July 2001. ISSN 0002-9297. doi: 585  
10.1086/321276. 586
- Zachary R. Sailer and Michael J. Harms. Detecting High-Order Epistasis 587  
in Nonlinear Genotype-Phenotype Maps. *Genetics*, 205(3):1079–1088, March 588  
2017a. ISSN 0016-6731, 1943-2631. doi: 10.1534/genetics.116.195214. URL 589  
<http://www.genetics.org/content/205/3/1079>. 590
- Zachary R. Sailer and Michael J. Harms. Molecular ensembles make evolution un- 591  
predictable. *Proceedings of the National Academy of Sciences*, 114(45):11938–11943, 592  
November 2017b. ISSN 0027-8424, 1091-6490. doi: 10.1073/pnas.1711927114. URL 593  
<http://www.pnas.org/content/114/45/11938>. 594
- Martijn F. Schenk, Ivan G. Szendro, Merijn L. M. Salverda, Joachim Krug, and J. Arjan 595

- G. M. de Visser. Patterns of Epistasis between Beneficial Mutations in an Antibiotic Resistance Gene. *Mol Biol Evol*, 30(8):1779–1787, January 2013. ISSN 0737-4038, 1537-1719. doi: 10.1093/molbev/mst096.
- Gideon Schreiber and Alan R. Fersht. Energetics of protein-protein interactions: Analysis of the Barnase-Barstar interface by single mutations and double mutant cycles. *Journal of Molecular Biology*, 248(2):478–486, January 1995. ISSN 0022-2836. doi: 10.1016/S0022-2836(95)80064-6. URL <http://www.sciencedirect.com/science/article/pii/S0022283695800646>.
- Daniel Segrè, Alexander DeLuna, George M. Church, and Roy Kishony. Modular Epistasis in Yeast Metabolism. *Nat Genet*, 37(1):77–83, January 2005. ISSN 1061-4036. doi: 10.1038/ng1489.
- Sam Sinai, Eric Kelsic, George M. Church, and Martin A. Nowak. Variational auto-encoding of protein sequences. *arXiv:1712.03346 [cs, q-bio]*, December 2017. URL <http://arxiv.org/abs/1712.03346>. arXiv: 1712.03346.
- Tyler N. Starr, Lora K. Picton, and Joseph W. Thornton. Alternative evolutionary histories in the sequence space of an ancient protein. *Nature*, 549(7672):409–413, September 2017. ISSN 1476-4687. doi: 10.1038/nature23902. URL <https://www.nature.com/articles/nature23902>.
- Ivan G. Szendro, Martijn F. Schenk, Jasper Franke, Joachim Krug, and J. Arjan G. M. de Visser. Quantitative analyses of empirical fitness landscapes. *Journal of Statistical Mechanics: Theory and Experiment*, 2013(01):P01005, 2013. ISSN 1742-5468. doi: 10.1088/1742-5468/2013/01/P01005. URL <http://stacks.iop.org/1742-5468/2013/i=01/a=P01005>.
- Nobuhiko Tokuriki, Colin J. Jackson, Livnat Afriat-Jurnou, Kirsten T. Wyganowski, Ren-

- mei Tang, and Dan S. Tawfik. Diminishing Returns and Tradeoffs Constrain the Laboratory Optimization of an Enzyme. *Nat Commun*, 3:1257, December 2012. doi: 10.1038/ncomms2246.
- S. van der Walt, S. C. Colbert, and G. Varoquaux. The NumPy Array: A Structure for Efficient Numerical Computation. *Computing in Science Engineering*, 13(2):22–30, March 2011. ISSN 1521-9615. doi: 10.1109/MCSE.2011.37.
- Sheng Wang, Siqi Sun, Zhen Li, Renyu Zhang, and Jinbo Xu. Accurate De Novo Prediction of Protein Contact Map by Ultra-Deep Learning Model. *PLOS Computational Biology*, 13(1):e1005324, January 2017. ISSN 1553-7358. doi: 10.1371/journal.pcbi.1005324. URL <http://journals.plos.org/ploscompbiol/article?id=10.1371/journal.pcbi.1005324>.
- Daniel M. Weinreich. High-Throughput Identification of Genetic Interactions in HIV-1. *Nat Genet*, 43(5):398–400, May 2011. ISSN 1061-4036. doi: 10.1038/ng.820.
- Daniel M. Weinreich, Nigel F. Delaney, Mark A. DePristo, and Daniel L. Hartl. Darwinian Evolution Can Follow Only Very Few Mutational Paths to Fitter Proteins. *Science*, 312(5770):111–114, July 2006. ISSN 0036-8075, 1095-9203. doi: 10.1126/science.1123539.
- Daniel M Weinreich, Yinghong Lan, C Scott Wylie, and Robert B. Heckendorn. Should Evolutionary Geneticists Worry about Higher-Order Epistasis? *Current Opinion in Genetics & Development*, 23(6):700–707, December 2013. ISSN 0959-437X. doi: 10.1016/j.gde.2013.10.007.
- Daniel M. Weinreich, Yinghong Lan, Jacob Jaffe, and Robert B. Heckendorn. The Influence of Higher-Order Epistasis on Biological Fitness Landscape Topography. *Journal of Statistical Physics*, 172(1):208–225, July 2018. ISSN 0022-4715, 1572-9613. doi: 10.1007/s10955-018-1975-3. URL <https://link.springer.com/article/10.1007/s10955-018-1975-3>.
- Shozo Yokoyama, Jinyi Xing, Yang Liu, Davide Faggionato, Ahmet Altun, and William T.

Starmer. Epistatic Adaptive Evolution of Human Color Vision. *PLOS Genet*, 10(12): 644  
e1004884, December 2014. ISSN 1553-7404. doi: 10.1371/journal.pgen.1004884. 645
